# Supplementary material
Source: PubMed Central journal article supplement (PMC6071799)
Supplement: MD-009-C8MD00147B-s001.pdf [file MD-009-C8MD00147B-s001.pdf]

## Supporting Informations

| Compound ID (enantiomers RR) | Cluster population | E / kcal mol <sup>-1</sup> |
|------------------------------|--------------------|----------------------------|
| 11a                          | 11                 | -4.44                      |
| 11b                          | 13                 | -4.39                      |
|                              | 22                 | -2.64                      |
| 11c                          | 14                 | -4.64                      |
| 11d                          | 22                 | -3.84                      |
| 11e                          | 16                 | -4.99                      |
|                              | 37                 | -4.42                      |
| 11f                          | 27                 | -3.71                      |
| 11g                          | 25                 | -4.57                      |
| 11h                          | 28                 | -5.37                      |
| 11i                          | 85                 | -5.16                      |
| 11j                          | 15                 | -5.7                       |
|                              | 38                 | -5.5                       |
| 2b                           | 16                 | -4.11                      |
|                              | 45                 | -4.02                      |
|                              | 32                 | -3.97                      |

**Table S1: Docking results for RR enantiomers. Only clusters with more than 10 conformations are reported.**

| Compound ID (enantiomers SS) | Cluster population | E / kcal mol <sup>-1</sup> |
|------------------------------|--------------------|----------------------------|
| 11a                          | 47                 | -5.56                      |
|                              | 29                 | -3.88                      |
| 11b                          | 53                 | -5.74                      |
| 11c                          | 27                 | -5.85                      |
|                              | 44                 | -4.17                      |
| 11d                          | 66                 | -4.01                      |
| 11e                          | 59                 | -5.22                      |
| 11f                          | 45                 | -3.76                      |
| 11g                          | 34                 | -4.61                      |
| 11h                          | 47                 | -6.34                      |
| 11i                          | 100                | -5.61                      |
| 11j                          | 29                 | -5.46                      |
|                              | 65                 | -5.16                      |
| 2a                           | 92                 | -5.02                      |

**Table S2: Docking results for SS enantiomers.**

## Supplementary Figure S1

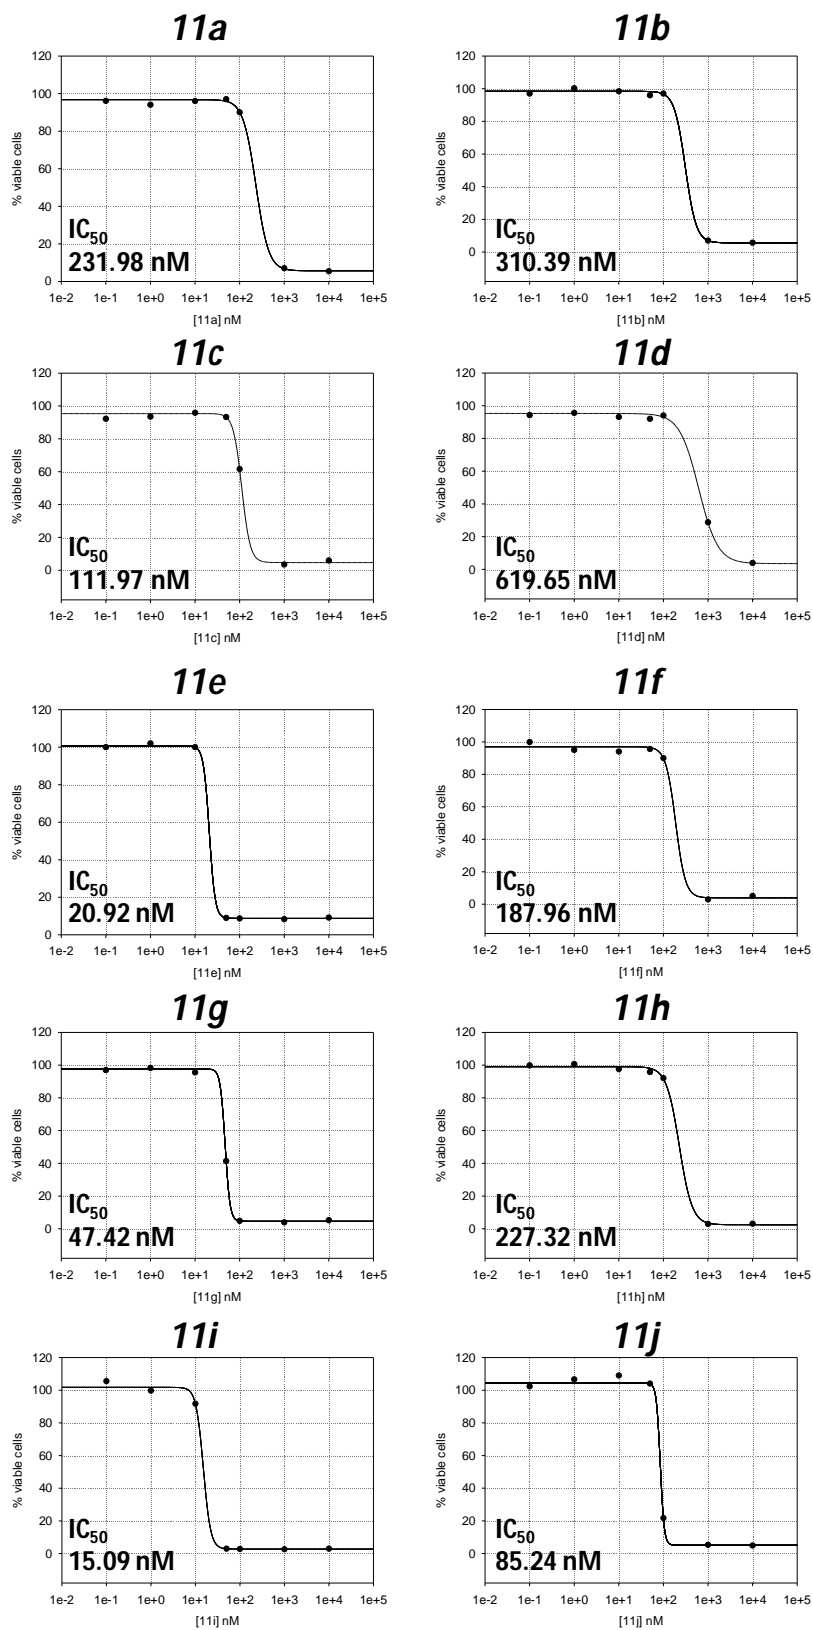

**Figure S1.** Representative plots of inhibition vs concentration with fit-curves of compounds **11a-j**. Mean  $IC_{50}$  values are reported in Table 1.

## Supplementary Figure S2

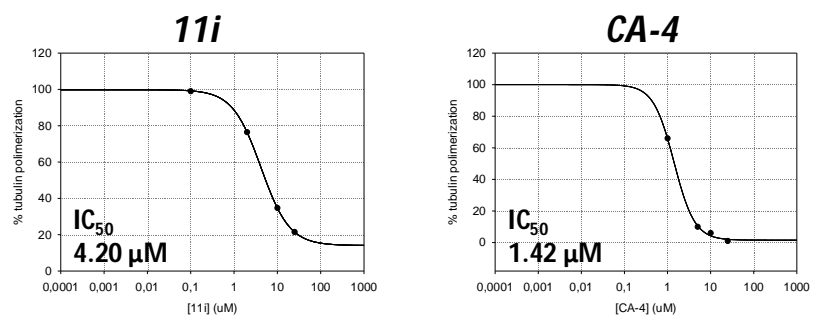

**Figure S2.** Representative plots of tubulin polymerization inhibition with fit-curves of compounds **11i** and **CA-4**. Mean  $IC_{50}$  values are reported in Table 2.
